# Supplementary material
Source: publisher site journal article supplement (https://www.spandidos-publications.com/7883/downloadSupplementary)
Supplement: Supplementary file 1 [file downloadSupplementary]

## Sheet: Table SI
Table SI. Details of patients included in the datasets.
A, GSE65904 dataset
Variable	n (%)
Sex
Male	124 (58.00)
Female	89 (41.60)
Not available	1 (0.50)
Age at diagnosis
<60 years	80 (37.40)
≥60 years	130 (60.70)
Not available	4 (1.90)
Tumour type
Primary cutaneous melanoma	16 (7.50)
Metastatic lesion	188 (87.90)
Not available	10 (4.70)
Metastasis subtype
Local cutaneous	11 (5.10)
In-transit / subcutaneous	15 (7.00)
Regional lymph-node	139 (64.90)
Distant / visceral	23 (10.70)
Not available	26 (12.10)
Primary-tumour anatomical site
Upper limb	25 (11.70)
Lower limb	61 (28.50)
Trunk	72 (33.60)
Head/neck or other	14 (6.50)
Not available	42 (19.60)
Histological subtype
Superficial-spreading melanoma	47 (22.00)
Nodular melanoma	72 (33.60)
Acral lentiginous / lentigo maligna / other	15 (7.00)
Unknown primary	28 (13.10)
Not available	52 (24.30)
B, TCGA-SKCM dataset
Variable	n (%)
Age
<60 years	244 (53.20)
>60 years	215 (46.80)
Sex
Female	173 (37.70)
Male	286 (62.30)
Ethnicity
Asian	12 (2.60)
Black or African-American	1 (0.20)
Not reported	9 (2.00)
White	437 (95.20)
AJCC stage
0	6 (1.30)
I	30 (6.50)
IA	18 (3.90)
IB	30 (6.50)
II	29 (6.30)
IIA	18 (3.90)
IIB	28 (6.10)
IIC	61 (13.30)
III	41 (8.90)
IIIA	16 (3.50)
IIIB	46 (10.00)
IIIC	67 (14.60)
IV	23 (5.00)
Tumor behavior
Metastatic	360 (78.40)
Not applicable	1 (0.20)
Primary	98 (21.40)
Survival status
Alive	237 (51.60)
Dead	221 (48.10)
Not reported	1 (0.20)
TCGA, The Cancer Genome Atlas; SKCM, skin cutaneous melanoma; AJCC, American Joint Committee on Cancer.
